# Supplementary material
Source: Springer Nature journal article supplement (https://www.springermedizin.de/resource/supplementary/13256_2010_1554_MOESM1_ESM.pdf/9647942)

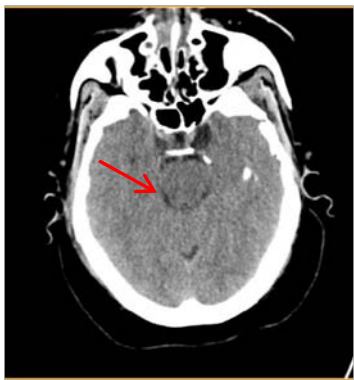

**A**

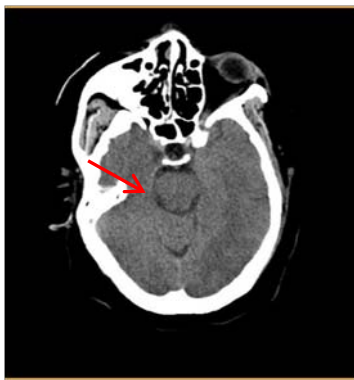

**D**

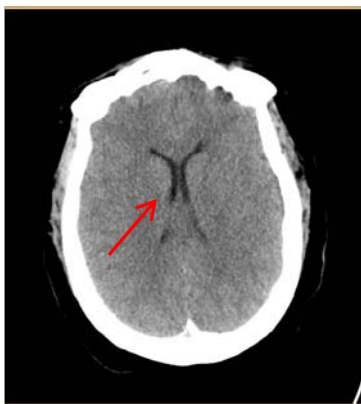

**B**

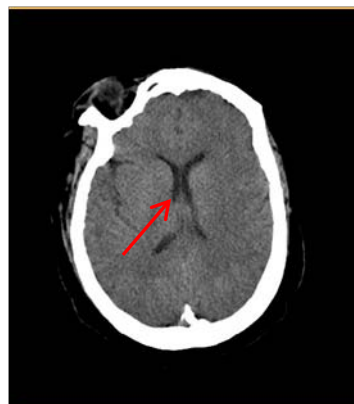

**E**

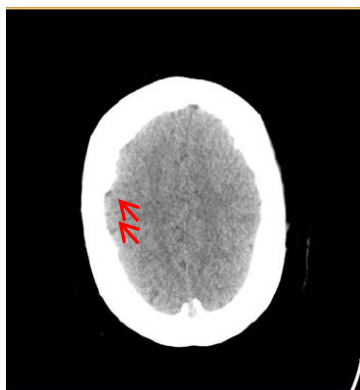

**C**

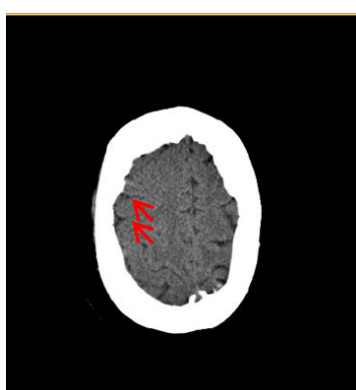

**F**

Supplement: MOESM1 [file 9647942]
